# Supplementary material for: Screening of sleep apnea based on heart rate variability and long short-term memory
Source: PubMed Central journal article supplement (PMC8590683; doi:10.1007/s11325-020-02249-0), 2021-01-10
Supplement: 11325_2020_2249_MOESM1_ESM.pdf [file 11325_2020_2249_MOESM1_ESM.pdf]

Table 1: Profiles of subjects included in this study

| Subject | Sex | Age | BMI  | AHI | Subject | Sex | Age | BMI  | AHI  |
|---------|-----|-----|------|-----|---------|-----|-----|------|------|
| H1      | F   | 19  | 20.5 | 1.2 | H31     | F   | 46  | 22.1 | 6.5  |
| H2      | F   | 19  | 18.3 | 0.0 | H32     | F   | 31  | 21.6 | 2.1  |
| H3      | F   | 20  | 21.7 | 0.0 | H33     | F   | 46  | 23.8 | 1.6  |
| H4      | F   | 20  | 21.9 | 0.6 | H34     | M   | 38  | 28.7 | 0.9  |
| H5      | F   | 19  | 26.6 | 0.8 | H35     | M   | 36  | 22.2 | 11.8 |
| H6      | M   | 19  | 24.1 | 0.6 | P1      | M   | 76  | 21.7 | 56.9 |
| H7      | F   | 23  | 19.2 | 0.3 | P2      | M   | 58  | 27.4 | 16.7 |
| H8      | M   | 23  | 21.5 | 1.5 | P3      | M   | 69  | 23.0 | 19.9 |
| H9      | M   | 24  | 23.1 | 0.6 | P4      | M   | 45  | 29.0 | 25.6 |
| H10     | M   | 42  | 24.9 | 0.7 | P5      | F   | 66  | 25.8 | 15.3 |
| H11     | M   | 42  | 19.6 | 3.1 | P6      | M   | 63  | 26.4 | 25.8 |
| H12     | M   | 23  | 19.8 | 1.5 | P7      | M   | 55  | 29.8 | 63.2 |
| H13     | F   | 40  | 22.2 | 0.7 | P8      | M   | 71  | 24.7 | 40.8 |
| H14     | F   | 40  | 21.6 | 0.6 | P9      | M   | 51  | 23.3 | 16.1 |
| H15     | F   | 23  | 19.7 | 1.8 | P10     | M   | 51  | 33.1 | 44.7 |
| H16     | M   | 25  | 27.2 | 6.5 | P11     | M   | 46  | 29.6 | 21.9 |
| H17     | F   | 24  | 25.6 | 0.0 | P12     | M   | 40  | 24.8 | 32.1 |
| H18     | F   | 19  | 20.3 | 0.2 | P13     | M   | 28  | 18.4 | 30.8 |
| H19     | F   | 21  | 18.8 | 0.0 | P14     | M   | 65  | 27.2 | 20.1 |
| H20     | F   | 24  | 20.5 | 0.0 | P15     | M   | 51  | 23.7 | 26.8 |
| H21     | M   | 23  | 20.8 | 0.4 | P16     | M   | 72  | 24.9 | 38.6 |
| H22     | M   | 19  | 19.2 | 0.2 | P17     | M   | 77  | 22.1 | 28.1 |
| H23     | F   | 19  | 20.3 | 0.0 | P18     | M   | 42  | 38.2 | 49.3 |
| H24     | F   | 19  | 20.3 | 0.0 | P19     | M   | 76  | 28.3 | 52.1 |
| H25     | M   | 45  | 23.1 | 7.9 | P20     | M   | 49  | 27.2 | 44.0 |
| H26     | M   | 33  | 23.4 | 1.9 | P21     | M   | 58  | 23.6 | 31.7 |
| H27     | F   | 23  | 19.5 | 0.3 | P22     | M   | 37  | 30.0 | 58.9 |
| H28     | F   | 37  | 18.7 | 0.0 | P23     | F   | 68  | 26.8 | 30.7 |
| H29     | M   | 31  | 21.7 | 1.4 | P24     | F   | 23  | 31.5 | 75.8 |
| H30     | F   | 22  | 19.2 | 1.8 |         |     |     |      |      |
